# Supplementary material for: A Novel R2R3–MYB Transcription Factor FaMYB10-like Promotes Light-Induced Anthocyanin Accumulation in Cultivated Strawberry
Source: MDPI journal article supplement (doi:10.3390/ijms242316561), 2023-11-21
Supplement: s1 [file s1]

## Supplementary Material

>FaMYB10L

ATGGAGGTGAGAAAAGGCTCATGGACCAAAGAGGAAGATCATCTTCTCAGGAACTACA  
TTGAGAAACATGGTGAGGGAAGATGGCACAAGGTTCTCTCCAAGCAGGCTTGAACAG  
ATGCAGAAAGAGCTGCCGAATCAGGTGGTTGAATTATTTGAAGCCAAACATCAAGAGA  
GGAGACTTTGAAGAGGATGAAGTCGATCTAATGATCAGGCTTCGTAAGCTTTTGGGAAA  
CAGGTGGTCTTTGATTGCTGGACGGCTTCCCGGAAGAACATCAAACGATGTGAAAAACT  
ATTGGAGTGCTCGACGAAGAAAAAACATAAACTTTGGCATCACGAATCATAATTATAAG  
CCTCCAGAAGTAACAAAGACTACAGTAATAAGACCTCGACCACGAACCTTCACCAAAAG  
TTTGCATTATTTGAATGCTAAAGTTACGACTTCAAATCCTATTGAATTAGGAAACAGTTC  
ATCGTCAACATCACCACCTATAGAGAATGGAATTGATGACTGGAAAACTCTACTACATG  
AAGATGTCCTGACAAACTTTTGGGTTGAGGATACAGCCTCAATGTCAAGTATAGGTGTC  
AATTCTACTGAGCAAGGTTTTGAAATGGACCTGTGGCAGTTTTTACAAGAAGAAACAAG  
GCAATAA

**Supplementary Figure S1.** The coding sequences of FaMYB10L. The sequence from translation start site (ATG) to stop codon for FaMYB10L.

>proFaMYB10L

ATAAATGTTGCTTGTTTTTAATATTGTATAGTTTCTTGGTGGAGTATTTATGGAAACCAA  
GTACCACTTTTGCAAAGAATGGCTAAAAGAATACTTGGTTTGACCACAAGTTCATTTCGA  
ATGTGAAAGAAATTGGAGTGCTTTTGAGGGGGTAAGTACTTATTTTATTTAGTTATGCAC  
TAATACAAACTAGCAATATAGTTTATCAATTAATTCTTTTTCCCTAATGTAGATACATAC  
AAAGAAAATGAATAGACTAGATACAACAAGGTTGAACAATTTAGTGTATGTCCAATTCA  
ATGCAAGGATTATGAACAAGAAAAGAAGAGAGAAAGAGAAGAATGTGGATGTACTACT  
TGCTAGTGAAGCAATTATGGCACAAGAATGGATTGTTTATGGTGGTGTATGAAGATGTTG  
AGTCGGATCTTACTAGTGAAATGGTTGGAGATGATTTGGGAGTGGGTAGTGGCTTAGAG  
CCTCGGAGAAGTTCTAGACTTCAAGAAATTAGAGAACTTCATGAGGATGATTTTGTATC  
GGATGAAGAGGAAGAAGATGAAATAGACTTTGAGTTTGAGACCGACACAGAAGAAGTG  
CAAGAGGAATATGGAGAAGAAGAATTTGAGGCATAGCCGCATAGGCTAGCAAGAATCT  
AATAATTTGTTTCTTTCAAATTGTTTTTTTTTTTATAATTTCTAAGAACATTGTTGTTAAA  
CATTTTGTCTATCTTTGAAGTATTTTTGCTATTTTAGAACATAATAATGTTTTTTATAAAT  
TTTATTTATATAATTATTTTAATTAAATAAATAAAAAATATAAAAAATAAAAAACCGCCT  
AGGAGCCCGATTAATCCTCTGGGCGCTACGCGCTGGCTGTCGGCCCGACTAGCGCCTAA  
CGTTTTTTTAGAACATTGATGACTTGGATAAGTTAAATGTAAAAAGAGTGGATTGTTAAT  
ATTAATCGATGTTTATCTTAATTTTGAAATGATAATACATTAAGTTAGTTTTTTATTTAAC  
AATATATACTGATTTTCGTACTTATCTAAATTTGTATTTTACTAAATTAATTTTATCAATT  
ATATATTTTGTTTTGTTACAGTTATCAGTGCCTATTAACAAAAGAATACAAAAAATATAG  
AACCGTATCATTTGCTCCGGTCAAATGGCACGCTTAATAAAGTATATATATCTACGTTTA  
ATAAAGTGTATCTAAAAAGGGTAACCTTTGGCCATATTTCTAGTAGTGATTTGTCAGTGT  
ATACTAAACTATGAAAAATGGAATGGTCCAGGAAGAAGTTTGCAATCATTGTCCTTTT  
TTCTTTTCTTTTTTTGCACTAATTTTTTTCGACTATCACTATTAGTAGTGTTAACTGGAGGG

GTCTCACTGATCCGTCAACAGTGTTTACATTTAACAGTATGTTATTTACAACCTTAATCTTT  
 TTTTTCGATTACTAATTACATCTTAATCTGCACATGCATAAGTTATGTCAAAAATAACCA  
 CCGGGGAAACGGTGGGGTGGAAAGCACTGACTTCTCTAACCAAGAGGTCTGGTGTTCGA  
 ATCCCCATTAAGGCCTTGGTGGCCAGCCGGCGGTGGCCCGTGCTAGGCAGGTGTGCCTG  
 GTGTGTGGTGTTCGCTTTCATGCCCGTGGCGATGCAGGGATTAGTCCGGCTGTGCTGGG  
 ATACCCTGCATGGGTGTGTGTGTACCTAATCTAACAAAGGCTAACCCCCAATCAAAAA  
 AAAAAAAAAAGTTATGTCAAAAATAGAACTACGTACCACTCAAAACGTATATCTGTGGAC  
 AGCAGAACTACACGTAGGTATGTCCGTATGTGTTCAATTAAAATCATTTTTGATGGATGT  
 GAAGCCTCATTGAGTTGCCTTGTACTGTTTGGCCGGGGAGCATTGAGATTATTATATAT

**Supplementary Figure S2.** The promoter sequence of *FaMYB10L*

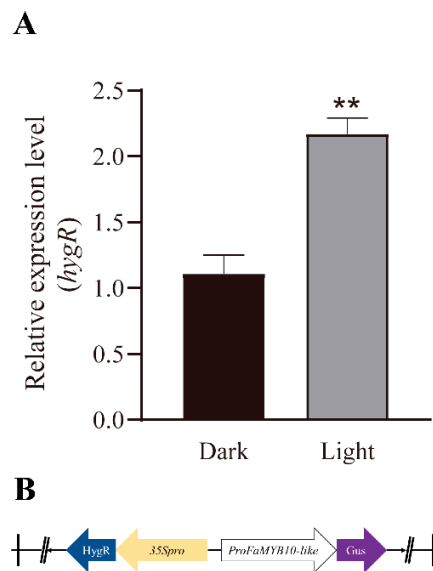

**Supplementary Figure S3.** (A) The expression level of *Gus* in transiently *ProFaMYB10L::Gus*-expressing tobacco leaves under light/dark. *HygR* was the internal reference gene. (B) Schematic diagram of vectors. Error bars for expression level represent the SD of three independent replicates. \*\*  $p < 0.01$  (two-tailed Student's *t*-test).

### Data Availability Statement

The transcriptome data from this study have been uploaded to NCBI Sequence Read Archive 544 database under BioProject ID: PRJNA993995.
